# Supplementary material for: Controllable Layered Structures in Polyoxomolybdate-Surfactant Hybrid Crystals
Source: Materials (Basel). 2010 Jan 6;3(1):158–64. doi: 10.3390/ma3010158 (PMC5510187; doi:10.3390/ma3010158)
Supplement: Supplementary File 1 [file materials-03-00158-s001.cif]

 
data_c16_mo8 
 
_audit_creation_method            SHELXL-97 

_publ_contact_author

;
Takeru Ito
Department of Chemistry, School of Science
Tokai University
1117 Kitakaname, Hiratsuka 259-1292, Japan
;

_publ_contact_author_email  'takeito@keyaki.cc.u-tokai.ac.jp'
_publ_contact_author_fax    '81-463-50-2094'
_publ_contact_author_phone  '81-463-58-1211 ex.3737'


_publ_section_title
;
Controllable Layered Structures in Polyoxomolybdate-Surfactant Hybrid Crystals
;
loop_
    _publ_author_name
    _publ_author_address
    'ITO, Takeru'
; Chemical Resources Laboratory, 
  Tokai University,
  1117 Kitakaname,
  Hiratsuka 259-1292, 
  Japan
;
    'Yamase, Toshihiro'
; Chemical Resources Laboratory, 
  Tokyo Institute of Technology,
  4259 Nagatsuta, Midori-ku, 
  Yokohama 226-8503, 
  Japan
;

_journal_name_full           
;
  Materials
;

_chemical_name_systematic 
; 
 tetra(hexadecyltrimethylammonium) octamolybdate
; 
_chemical_name_common             ? 
_chemical_melting_point           ? 
_chemical_formula_moiety          
;
 4(C19 H42 N), Mo8 O26 
;
_chemical_formula_sum 
 'C76 H168 Mo8 N4 O26' 
_chemical_formula_weight          2321.66 
 
loop_ 
 _atom_type_symbol 
 _atom_type_description 
 _atom_type_scat_dispersion_real 
 _atom_type_scat_dispersion_imag 
 _atom_type_scat_source 
 'C'  'C'   0.0033   0.0016 
 'International Tables Vol C Tables 4.2.6.8 and 6.1.1.4' 
 'H'  'H'   0.0000   0.0000 
 'International Tables Vol C Tables 4.2.6.8 and 6.1.1.4' 
 'N'  'N'   0.0061   0.0033 
 'International Tables Vol C Tables 4.2.6.8 and 6.1.1.4' 
 'Mo'  'Mo'  -1.6832   0.6857 
 'International Tables Vol C Tables 4.2.6.8 and 6.1.1.4' 
 'O'  'O'   0.0106   0.0060 
 'International Tables Vol C Tables 4.2.6.8 and 6.1.1.4' 
 
_symmetry_cell_setting            triclinic 
_symmetry_space_group_name_H-M    'P -1' 
 
loop_ 
 _symmetry_equiv_pos_as_xyz 
 'x, y, z' 
 '-x, -y, -z' 
 
_cell_length_a                    9.958(8) 
_cell_length_b                    11.149(3) 
_cell_length_c                    24.95(2) 
_cell_angle_alpha                 98.06(4) 
_cell_angle_beta                  94.828(7) 
_cell_angle_gamma                 115.66(4) 
_cell_volume                      2439(3) 
_cell_formula_units_Z             1 
_cell_measurement_temperature     173(2) 
_cell_measurement_reflns_used     12441
_cell_measurement_theta_min       3.1 
_cell_measurement_theta_max       27.5
 
_exptl_crystal_description        'platelet'
_exptl_crystal_colour             'colorless'
_exptl_crystal_size_max           0.10 
_exptl_crystal_size_mid           0.10 
_exptl_crystal_size_min           0.02 
_exptl_crystal_density_meas       ? 
_exptl_crystal_density_diffrn     1.580 
_exptl_crystal_density_method     'not measured' 
_exptl_crystal_F_000              1196 
_exptl_absorpt_coefficient_mu     1.062 
_exptl_absorpt_correction_type    numerical 
_exptl_absorpt_correction_T_min   0.9012 
_exptl_absorpt_correction_T_max   0.9791 
_exptl_absorpt_process_details    
;
    Higashi, T. (1999). Numabs - Numerical Absorption Correction.
    Rigaku Corporation, Tokyo, Japan.
;
_exptl_special_details 
; 
 ? 
; 
 
_diffrn_ambient_temperature       173(2) 
_diffrn_radiation_wavelength      0.71075 
_diffrn_radiation_type            MoK\a 
_diffrn_radiation_source          'fine-focus sealed tube' 
_diffrn_radiation_monochromator   graphite 
_diffrn_measurement_device_type   'Rigaku RAXIS-RAPID' 
_diffrn_measurement_method        \w 
_diffrn_detector_area_resol_mean  10.00
_diffrn_standards_number          ? 
_diffrn_standards_interval_count  ? 
_diffrn_standards_interval_time   ? 
_diffrn_standards_decay_%         ? 
_diffrn_reflns_number             21313 
_diffrn_reflns_av_R_equivalents   0.1257 
_diffrn_reflns_av_sigmaI/netI     0.3289 
_diffrn_reflns_limit_h_min        -12 
_diffrn_reflns_limit_h_max        12 
_diffrn_reflns_limit_k_min        -14 
_diffrn_reflns_limit_k_max        14 
_diffrn_reflns_limit_l_min        -29 
_diffrn_reflns_limit_l_max        32 
_diffrn_reflns_theta_min          3.05 
_diffrn_reflns_theta_max          27.48 
_reflns_number_total              10383 
_reflns_number_gt                 3745 
_reflns_threshold_expression      >2sigma(I) 
 
_computing_data_collection        'PROCESS-AUTO (Rigaku)'
_computing_cell_refinement        'PROCESS-AUTO (Rigaku)'
_computing_data_reduction         'CrystalStructure (Rigaku/MSC)'
_computing_structure_solution     'SHELXS-97 (Sheldrick, 1990)' 
_computing_structure_refinement   'SHELXL-97 (Sheldrick, 1997)' 
_computing_molecular_graphics     ? 
_computing_publication_material   ? 
 
_refine_special_details 
; 
 Refinement of F^2^ against ALL reflections.  The weighted R-factor wR and 
 goodness of fit S are based on F^2^, conventional R-factors R are based 
 on F, with F set to zero for negative F^2^. The threshold expression of 
 F^2^ > 2sigma(F^2^) is used only for calculating R-factors(gt) etc. and is 
 not relevant to the choice of reflections for refinement.  R-factors based 
 on F^2^ are statistically about twice as large as those based on F, and R- 
 factors based on ALL data will be even larger. 
; 
 
_refine_ls_structure_factor_coef  Fsqd  
_refine_ls_matrix_type            full 
_refine_ls_weighting_scheme       calc  
_refine_ls_weighting_details 
 'calc w=1/[\s^2^(Fo^2^)+(0.0269P)^2^+0.0000P] where P=(Fo^2^+2Fc^2^)/3' 
_atom_sites_solution_primary      direct 
_atom_sites_solution_secondary    difmap 
_atom_sites_solution_hydrogens    geom 
_refine_ls_hydrogen_treatment     constr 
_refine_ls_extinction_method      none 
_refine_ls_extinction_coef        ? 
_refine_ls_number_reflns          10383 
_refine_ls_number_parameters      515 
_refine_ls_number_restraints      0 
_refine_ls_R_factor_all           0.1779 
_refine_ls_R_factor_gt            0.0513 
_refine_ls_wR_factor_ref          0.0921 
_refine_ls_wR_factor_gt           0.0719 
_refine_ls_goodness_of_fit_ref    0.713 
_refine_ls_restrained_S_all       0.713 
_refine_ls_shift/su_max           0.001 
_refine_ls_shift/su_mean          0.000 
 
loop_ 
 _atom_site_label 
 _atom_site_type_symbol 
 _atom_site_fract_x 
 _atom_site_fract_y 
 _atom_site_fract_z 
 _atom_site_U_iso_or_equiv 
 _atom_site_adp_type 
 _atom_site_occupancy 
 _atom_site_symmetry_multiplicity 
 _atom_site_calc_flag 
 _atom_site_refinement_flags 
 _atom_site_disorder_assembly 
 _atom_site_disorder_group 
Mo1 Mo 0.35295(6) 0.17244(7) 0.49359(3) 0.02063(18) Uani 1 1 d . . . 
Mo2 Mo 0.50179(7) 0.38048(7) 0.61487(3) 0.02204(18) Uani 1 1 d . . . 
Mo3 Mo 0.68054(6) 0.49554(7) 0.49460(3) 0.01865(18) Uani 1 1 d . . . 
Mo4 Mo 0.65568(7) 0.72968(7) 0.63057(3) 0.0301(2) Uani 1 1 d . . . 
O1 O 0.3859(5) 0.0435(5) 0.46352(18) 0.0273(13) Uani 1 1 d . . . 
O2 O 0.1924(4) 0.0939(5) 0.52044(19) 0.0278(13) Uani 1 1 d . . . 
O3 O 0.2600(5) 0.2046(4) 0.42914(18) 0.0267(13) Uani 1 1 d . . . 
O4 O 0.5005(4) 0.2434(4) 0.55910(18) 0.0214(12) Uani 1 1 d . . . 
O5 O 0.3382(5) 0.2899(5) 0.63829(18) 0.0257(13) Uani 1 1 d . . . 
O6 O 0.6407(4) 0.3944(5) 0.66350(18) 0.0258(13) Uani 1 1 d . . . 
O7 O 0.5064(5) 0.5571(4) 0.63165(17) 0.0244(12) Uani 1 1 d . . . 
O8 O 0.5885(5) 0.8362(5) 0.65836(19) 0.0333(14) Uani 1 1 d . . . 
O9 O 0.8084(5) 0.7547(5) 0.6745(2) 0.0414(15) Uani 1 1 d . . . 
O10 O 0.6891(5) 0.5161(5) 0.56651(18) 0.0298(13) Uani 1 1 d . . . 
O11 O 0.6313(5) 0.6159(5) 0.46914(19) 0.0372(14) Uani 1 1 d . . . 
O12 O 0.8552(5) 0.5236(5) 0.47995(19) 0.0322(14) Uani 1 1 d . . . 
O13 O 0.5519(5) 0.3290(5) 0.46093(19) 0.0331(14) Uani 1 1 d . . . 
N1 N 0.2069(5) -0.1453(6) 0.6131(2) 0.0188(14) Uani 1 1 d . . . 
N2 N -0.0528(5) 0.2635(6) 0.6196(2) 0.0226(15) Uani 1 1 d . . . 
C1 C 0.3324(7) -0.1016(7) 0.5811(3) 0.028(2) Uani 1 1 d . . . 
H1A H 0.3424 -0.0198 0.5679 0.033 Uiso 1 1 calc R . . 
H1B H 0.3113 -0.1742 0.5497 0.033 Uiso 1 1 calc R . . 
H1C H 0.4266 -0.0818 0.6044 0.033 Uiso 1 1 calc R . . 
C2 C 0.0625(7) -0.1812(8) 0.5766(3) 0.040(2) Uani 1 1 d . . . 
H2A H -0.0210 -0.2102 0.5976 0.048 Uiso 1 1 calc R . . 
H2B H 0.0439 -0.2552 0.5461 0.048 Uiso 1 1 calc R . . 
H2C H 0.0700 -0.1016 0.5620 0.048 Uiso 1 1 calc R . . 
C3 C 0.1940(8) -0.2706(8) 0.6321(3) 0.045(2) Uani 1 1 d . . . 
H3A H 0.1121 -0.3009 0.6538 0.054 Uiso 1 1 calc R . . 
H3B H 0.2893 -0.2508 0.6547 0.054 Uiso 1 1 calc R . . 
H3C H 0.1722 -0.3422 0.6002 0.054 Uiso 1 1 calc R . . 
C4 C 0.2316(7) -0.0344(8) 0.6609(3) 0.031(2) Uani 1 1 d . . . 
H4A H 0.2246 0.0409 0.6461 0.037 Uiso 1 1 calc R . . 
H4B H 0.1480 -0.0705 0.6822 0.037 Uiso 1 1 calc R . . 
C5 C 0.3765(7) 0.0225(7) 0.6994(3) 0.033(2) Uani 1 1 d . . . 
H5A H 0.4618 0.0607 0.6791 0.040 Uiso 1 1 calc R . . 
H5B H 0.3846 -0.0509 0.7154 0.040 Uiso 1 1 calc R . . 
C6 C 0.3863(8) 0.1324(8) 0.7449(3) 0.040(2) Uani 1 1 d . . . 
H6A H 0.3066 0.0918 0.7673 0.048 Uiso 1 1 calc R . . 
H6B H 0.3672 0.2006 0.7286 0.048 Uiso 1 1 calc R . . 
C7 C 0.5383(8) 0.2024(8) 0.7817(3) 0.038(2) Uani 1 1 d . . . 
H7A H 0.6179 0.2376 0.7588 0.045 Uiso 1 1 calc R . . 
H7B H 0.5544 0.1345 0.7994 0.045 Uiso 1 1 calc R . . 
C8 C 0.5562(7) 0.3194(7) 0.8264(3) 0.031(2) Uani 1 1 d . . . 
H8A H 0.4797 0.2834 0.8504 0.037 Uiso 1 1 calc R . . 
H8B H 0.5353 0.3853 0.8088 0.037 Uiso 1 1 calc R . . 
C9 C 0.7118(8) 0.3939(8) 0.8617(3) 0.040(2) Uani 1 1 d . . . 
H9A H 0.7321 0.3278 0.8792 0.048 Uiso 1 1 calc R . . 
H9B H 0.7880 0.4287 0.8375 0.048 Uiso 1 1 calc R . . 
C10 C 0.7333(8) 0.5105(8) 0.9058(3) 0.032(2) Uani 1 1 d . . . 
H10A H 0.6607 0.4756 0.9313 0.038 Uiso 1 1 calc R . . 
H10B H 0.7098 0.5755 0.8887 0.038 Uiso 1 1 calc R . . 
C11 C 0.8923(7) 0.5850(8) 0.9385(3) 0.030(2) Uani 1 1 d . . . 
H11A H 0.9651 0.6162 0.9128 0.036 Uiso 1 1 calc R . . 
H11B H 0.9139 0.5209 0.9569 0.036 Uiso 1 1 calc R . . 
C12 C 0.9164(7) 0.7080(7) 0.9819(3) 0.030(2) Uani 1 1 d . . . 
H12A H 0.8944 0.7720 0.9634 0.036 Uiso 1 1 calc R . . 
H12B H 0.8433 0.6766 1.0075 0.036 Uiso 1 1 calc R . . 
C13 C 1.0730(7) 0.7825(8) 1.0144(3) 0.032(2) Uani 1 1 d . . . 
H13A H 1.1464 0.8145 0.9889 0.039 Uiso 1 1 calc R . . 
H13B H 1.0954 0.7188 1.0330 0.039 Uiso 1 1 calc R . . 
C14 C 1.0941(7) 0.9025(7) 1.0569(3) 0.028(2) Uani 1 1 d . . . 
H14A H 1.0201 0.8701 1.0821 0.034 Uiso 1 1 calc R . . 
H14B H 1.0714 0.9658 1.0382 0.034 Uiso 1 1 calc R . . 
C15 C 1.2513(8) 0.9798(8) 1.0906(3) 0.031(2) Uani 1 1 d . . . 
H15A H 1.3252 1.0137 1.0655 0.037 Uiso 1 1 calc R . . 
H15B H 1.2747 0.9162 1.1088 0.037 Uiso 1 1 calc R . . 
C16 C 1.2708(7) 1.0995(7) 1.1341(3) 0.029(2) Uani 1 1 d . . . 
H16A H 1.1943 1.0655 1.1583 0.034 Uiso 1 1 calc R . . 
H16B H 1.2498 1.1638 1.1155 0.034 Uiso 1 1 calc R . . 
C17 C 1.4268(7) 1.1769(7) 1.1698(3) 0.032(2) Uani 1 1 d . . . 
H17A H 1.4453 1.1146 1.1906 0.039 Uiso 1 1 calc R . . 
H17B H 1.5044 1.2064 1.1457 0.039 Uiso 1 1 calc R . . 
C18 C 1.4445(7) 1.3004(8) 1.2100(3) 0.036(2) Uani 1 1 d . . . 
H18A H 1.4243 1.3623 1.1895 0.044 Uiso 1 1 calc R . . 
H18B H 1.3691 1.2712 1.2349 0.044 Uiso 1 1 calc R . . 
C19 C 1.6015(7) 1.3765(8) 1.2438(3) 0.045(2) Uani 1 1 d . . . 
H19A H 1.6083 1.4551 1.2691 0.054 Uiso 1 1 calc R . . 
H19B H 1.6764 1.4072 1.2193 0.054 Uiso 1 1 calc R . . 
H19C H 1.6213 1.3161 1.2647 0.054 Uiso 1 1 calc R . . 
C20 C -0.0017(7) 0.1835(7) 0.5799(3) 0.0244(19) Uani 1 1 d . . . 
H20A H -0.0890 0.0988 0.5613 0.029 Uiso 1 1 calc R . . 
H20B H 0.0718 0.1624 0.5999 0.029 Uiso 1 1 calc R . . 
H20C H 0.0452 0.2370 0.5527 0.029 Uiso 1 1 calc R . . 
C21 C 0.0805(7) 0.3897(7) 0.6478(3) 0.034(2) Uani 1 1 d . . . 
H21A H 0.1500 0.3670 0.6694 0.041 Uiso 1 1 calc R . . 
H21B H 0.0481 0.4454 0.6722 0.041 Uiso 1 1 calc R . . 
H21C H 0.1317 0.4405 0.6205 0.041 Uiso 1 1 calc R . . 
C22 C -0.1546(8) 0.3032(8) 0.5875(3) 0.040(2) Uani 1 1 d . . . 
H22A H -0.2450 0.2215 0.5686 0.048 Uiso 1 1 calc R . . 
H22B H -0.1017 0.3536 0.5604 0.048 Uiso 1 1 calc R . . 
H22C H -0.1840 0.3606 0.6123 0.048 Uiso 1 1 calc R . . 
C23 C -0.1318(8) 0.1831(8) 0.6605(3) 0.031(2) Uani 1 1 d . . . 
H23A H -0.2272 0.1057 0.6410 0.037 Uiso 1 1 calc R . . 
H23B H -0.1582 0.2412 0.6869 0.037 Uiso 1 1 calc R . . 
C24 C -0.0400(7) 0.1282(7) 0.6926(3) 0.0254(19) Uani 1 1 d . . . 
H24A H 0.0667 0.1978 0.7021 0.030 Uiso 1 1 calc R . . 
H24B H -0.0435 0.0470 0.6693 0.030 Uiso 1 1 calc R . . 
C25 C -0.1023(8) 0.0907(8) 0.7451(3) 0.038(2) Uani 1 1 d . . . 
H25A H -0.0633 0.0305 0.7586 0.046 Uiso 1 1 calc R . . 
H25B H -0.2136 0.0390 0.7363 0.046 Uiso 1 1 calc R . . 
C26 C -0.0607(7) 0.2139(8) 0.7913(3) 0.036(2) Uani 1 1 d . . . 
H26A H -0.0880 0.2795 0.7763 0.043 Uiso 1 1 calc R . . 
H26B H -0.1226 0.1831 0.8203 0.043 Uiso 1 1 calc R . . 
C27 C 0.1060(7) 0.2879(8) 0.8178(3) 0.032(2) Uani 1 1 d . . . 
H27A H 0.1350 0.2237 0.8331 0.038 Uiso 1 1 calc R . . 
H27B H 0.1692 0.3217 0.7895 0.038 Uiso 1 1 calc R . . 
C28 C 0.1345(7) 0.4061(8) 0.8630(3) 0.033(2) Uani 1 1 d . . . 
H28A H 0.0633 0.3722 0.8890 0.040 Uiso 1 1 calc R . . 
H28B H 0.1117 0.4724 0.8466 0.040 Uiso 1 1 calc R . . 
C29 C 0.2931(8) 0.4790(8) 0.8948(3) 0.032(2) Uani 1 1 d . . . 
H29A H 0.3648 0.5120 0.8689 0.039 Uiso 1 1 calc R . . 
H29B H 0.3156 0.4136 0.9120 0.039 Uiso 1 1 calc R . . 
C30 C 0.3187(7) 0.5994(7) 0.9395(3) 0.029(2) Uani 1 1 d . . . 
H30A H 0.2950 0.6639 0.9220 0.035 Uiso 1 1 calc R . . 
H30B H 0.2463 0.5657 0.9651 0.035 Uiso 1 1 calc R . . 
C31 C 0.4754(8) 0.6756(8) 0.9723(3) 0.034(2) Uani 1 1 d . . . 
H31A H 0.5482 0.7087 0.9467 0.041 Uiso 1 1 calc R . . 
H31B H 0.4988 0.6117 0.9902 0.041 Uiso 1 1 calc R . . 
C32 C 0.4986(8) 0.7953(8) 1.0158(3) 0.035(2) Uani 1 1 d . . . 
H32A H 0.4248 0.7625 1.0410 0.042 Uiso 1 1 calc R . . 
H32B H 0.4772 0.8602 0.9978 0.042 Uiso 1 1 calc R . . 
C33 C 0.6575(7) 0.8703(8) 1.0495(3) 0.033(2) Uani 1 1 d . . . 
H33A H 0.6799 0.8058 1.0675 0.039 Uiso 1 1 calc R . . 
H33B H 0.7319 0.9048 1.0246 0.039 Uiso 1 1 calc R . . 
C34 C 0.6749(7) 0.9881(8) 1.0929(3) 0.031(2) Uani 1 1 d . . . 
H34A H 0.6534 1.0528 1.0748 0.037 Uiso 1 1 calc R . . 
H34B H 0.5993 0.9534 1.1174 0.037 Uiso 1 1 calc R . . 
C35 C 0.8304(7) 1.0624(8) 1.1272(3) 0.030(2) Uani 1 1 d . . . 
H35A H 0.9059 1.0919 1.1023 0.035 Uiso 1 1 calc R . . 
H35B H 0.8491 0.9984 1.1467 0.035 Uiso 1 1 calc R . . 
C36 C 0.8548(7) 1.1863(8) 1.1692(3) 0.036(2) Uani 1 1 d . . . 
H36A H 0.8340 1.2494 1.1498 0.043 Uiso 1 1 calc R . . 
H36B H 0.7803 1.1564 1.1945 0.043 Uiso 1 1 calc R . . 
C37 C 1.0108(8) 1.2628(8) 1.2030(3) 0.049(2) Uani 1 1 d . . . 
H37A H 1.0860 1.2906 1.1779 0.058 Uiso 1 1 calc R . . 
H37B H 1.0306 1.2012 1.2238 0.058 Uiso 1 1 calc R . . 
C38 C 1.0318(9) 1.3876(8) 1.2428(3) 0.054(3) Uani 1 1 d . . . 
H38A H 1.1349 1.4328 1.2633 0.065 Uiso 1 1 calc R . . 
H38B H 0.9596 1.3607 1.2684 0.065 Uiso 1 1 calc R . . 
H38C H 1.0144 1.4500 1.2225 0.065 Uiso 1 1 calc R . . 
 
loop_ 
 _atom_site_aniso_label 
 _atom_site_aniso_U_11 
 _atom_site_aniso_U_22 
 _atom_site_aniso_U_33 
 _atom_site_aniso_U_23 
 _atom_site_aniso_U_13 
 _atom_site_aniso_U_12 
Mo1 0.0210(4) 0.0132(4) 0.0268(5) 0.0032(3) 0.0032(3) 0.0072(3) 
Mo2 0.0224(4) 0.0182(4) 0.0251(5) 0.0039(4) 0.0010(3) 0.0095(3) 
Mo3 0.0168(4) 0.0155(4) 0.0248(4) 0.0040(3) 0.0030(3) 0.0083(3) 
Mo4 0.0237(4) 0.0277(5) 0.0422(5) 0.0147(4) 0.0068(4) 0.0122(4) 
O1 0.037(3) 0.025(3) 0.034(3) 0.011(3) 0.011(3) 0.024(3) 
O2 0.018(3) 0.033(4) 0.031(3) 0.003(3) 0.011(2) 0.009(2) 
O3 0.031(3) 0.016(3) 0.033(3) 0.006(3) -0.001(2) 0.011(2) 
O4 0.016(3) 0.016(3) 0.029(3) 0.000(2) 0.002(2) 0.005(2) 
O5 0.025(3) 0.019(3) 0.033(3) 0.002(3) 0.010(2) 0.010(2) 
O6 0.016(3) 0.033(4) 0.029(3) 0.004(3) -0.001(2) 0.012(2) 
O7 0.043(3) 0.021(3) 0.017(3) 0.002(3) 0.002(2) 0.023(3) 
O8 0.038(3) 0.023(3) 0.044(4) 0.006(3) 0.004(3) 0.018(3) 
O9 0.045(3) 0.054(4) 0.039(4) 0.022(3) 0.008(3) 0.031(3) 
O10 0.034(3) 0.023(3) 0.017(3) 0.000(3) -0.002(2) 0.000(2) 
O11 0.069(4) 0.032(4) 0.019(3) -0.007(3) -0.017(3) 0.039(3) 
O12 0.019(3) 0.040(4) 0.043(4) 0.007(3) 0.017(2) 0.016(3) 
O13 0.029(3) 0.018(3) 0.041(4) 0.003(3) 0.019(3) -0.001(2) 
N1 0.016(3) 0.014(4) 0.025(4) 0.001(3) 0.007(3) 0.005(3) 
N2 0.007(3) 0.025(4) 0.031(4) 0.002(3) 0.005(3) 0.003(3) 
C1 0.027(4) 0.037(6) 0.025(5) 0.009(4) 0.001(4) 0.019(4) 
C2 0.020(4) 0.046(6) 0.047(6) -0.001(5) 0.003(4) 0.010(4) 
C3 0.052(6) 0.017(5) 0.054(7) 0.007(5) 0.013(5) 0.005(4) 
C4 0.033(5) 0.029(5) 0.027(5) -0.002(4) 0.010(4) 0.012(4) 
C5 0.032(5) 0.022(5) 0.044(6) -0.009(4) -0.001(4) 0.015(4) 
C6 0.047(5) 0.032(6) 0.039(6) -0.005(5) 0.011(5) 0.020(5) 
C7 0.054(6) 0.040(6) 0.023(5) 0.000(5) 0.000(4) 0.028(5) 
C8 0.038(5) 0.026(5) 0.015(5) -0.008(4) -0.005(4) 0.008(4) 
C9 0.041(5) 0.051(7) 0.034(6) 0.003(5) 0.005(4) 0.028(5) 
C10 0.046(5) 0.027(5) 0.028(5) 0.004(4) 0.006(4) 0.022(4) 
C11 0.016(4) 0.038(6) 0.025(5) -0.004(4) -0.003(3) 0.005(4) 
C12 0.035(5) 0.024(5) 0.024(5) 0.001(4) -0.001(4) 0.007(4) 
C13 0.040(5) 0.029(6) 0.023(5) 0.000(4) 0.000(4) 0.014(4) 
C14 0.035(4) 0.023(5) 0.023(5) 0.002(4) 0.000(4) 0.011(4) 
C15 0.048(5) 0.039(6) 0.019(5) 0.008(4) 0.011(4) 0.029(5) 
C16 0.035(5) 0.027(5) 0.024(5) 0.011(4) 0.007(4) 0.013(4) 
C17 0.037(5) 0.026(5) 0.035(6) 0.009(4) 0.001(4) 0.016(4) 
C18 0.026(4) 0.043(6) 0.027(5) -0.008(5) 0.003(4) 0.009(4) 
C19 0.030(5) 0.053(7) 0.037(6) 0.004(5) -0.001(4) 0.007(4) 
C20 0.021(4) 0.018(5) 0.032(5) 0.000(4) 0.007(4) 0.007(4) 
C21 0.032(5) 0.028(6) 0.041(6) -0.002(4) 0.001(4) 0.015(4) 
C22 0.039(5) 0.061(7) 0.044(6) 0.015(5) 0.008(4) 0.043(5) 
C23 0.042(5) 0.037(6) 0.021(5) 0.007(4) 0.009(4) 0.023(4) 
C24 0.019(4) 0.013(5) 0.036(5) -0.001(4) 0.002(4) 0.001(4) 
C25 0.042(5) 0.026(6) 0.038(6) 0.010(5) 0.007(4) 0.008(4) 
C26 0.037(5) 0.030(6) 0.033(6) 0.001(5) 0.003(4) 0.010(4) 
C27 0.028(4) 0.032(6) 0.030(5) -0.004(4) -0.003(4) 0.013(4) 
C28 0.029(5) 0.030(6) 0.045(6) 0.018(5) 0.017(4) 0.012(4) 
C29 0.045(5) 0.035(6) 0.021(5) 0.006(4) 0.006(4) 0.022(4) 
C30 0.029(4) 0.029(5) 0.028(5) 0.004(4) 0.002(4) 0.011(4) 
C31 0.044(5) 0.023(5) 0.033(5) 0.000(4) 0.004(4) 0.013(4) 
C32 0.041(5) 0.034(6) 0.032(6) 0.011(5) 0.007(4) 0.017(4) 
C33 0.025(4) 0.030(6) 0.042(6) 0.007(5) 0.006(4) 0.011(4) 
C34 0.029(4) 0.032(6) 0.037(6) 0.010(4) 0.015(4) 0.015(4) 
C35 0.034(5) 0.034(6) 0.020(5) 0.004(4) 0.003(4) 0.015(4) 
C36 0.031(5) 0.032(6) 0.042(6) 0.004(5) 0.004(4) 0.013(4) 
C37 0.060(6) 0.044(7) 0.035(6) -0.007(5) -0.022(5) 0.027(5) 
C38 0.088(7) 0.042(7) 0.034(6) 0.007(5) -0.004(5) 0.033(6) 
 
_geom_special_details 
; 
 All esds (except the esd in the dihedral angle between two l.s. planes) 
 are estimated using the full covariance matrix.  The cell esds are taken 
 into account individually in the estimation of esds in distances, angles 
 and torsion angles; correlations between esds in cell parameters are only 
 used when they are defined by crystal symmetry.  An approximate (isotropic) 
 treatment of cell esds is used for estimating esds involving l.s. planes. 
; 
 
loop_ 
 _geom_bond_atom_site_label_1 
 _geom_bond_atom_site_label_2 
 _geom_bond_distance 
 _geom_bond_site_symmetry_2 
 _geom_bond_publ_flag 
Mo1 O1 1.698(4) . ? 
Mo1 O2 1.704(4) . ? 
Mo1 O4 1.919(4) . ? 
Mo1 O3 1.942(4) . ? 
Mo1 O13 2.305(5) . ? 
Mo1 O11 2.345(5) 2_666 ? 
Mo2 O6 1.700(4) . ? 
Mo2 O5 1.708(4) . ? 
Mo2 O4 1.912(4) . ? 
Mo2 O7 1.935(4) . ? 
Mo2 O10 2.381(5) . ? 
Mo2 O11 2.399(5) 2_666 ? 
Mo3 O12 1.711(4) . ? 
Mo3 O13 1.765(5) . ? 
Mo3 O10 1.766(5) . ? 
Mo3 O11 1.788(4) . ? 
Mo4 O9 1.690(5) . ? 
Mo4 O8 1.696(4) . ? 
Mo4 O3 1.856(5) 2_666 ? 
Mo4 O7 1.859(5) . ? 
O3 Mo4 1.856(5) 2_666 ? 
O11 Mo1 2.345(5) 2_666 ? 
O11 Mo2 2.399(5) 2_666 ? 
N1 C1 1.480(7) . ? 
N1 C3 1.493(8) . ? 
N1 C2 1.496(7) . ? 
N1 C4 1.512(8) . ? 
N2 C21 1.478(8) . ? 
N2 C22 1.488(8) . ? 
N2 C23 1.497(8) . ? 
N2 C20 1.506(7) . ? 
C4 C5 1.486(9) . ? 
C5 C6 1.513(9) . ? 
C6 C7 1.512(9) . ? 
C7 C8 1.527(9) . ? 
C8 C9 1.523(9) . ? 
C9 C10 1.505(9) . ? 
C10 C11 1.521(9) . ? 
C11 C12 1.538(9) . ? 
C12 C13 1.503(9) . ? 
C13 C14 1.511(9) . ? 
C14 C15 1.518(9) . ? 
C15 C16 1.527(9) . ? 
C16 C17 1.531(9) . ? 
C17 C18 1.519(9) . ? 
C18 C19 1.518(8) . ? 
C23 C24 1.533(8) . ? 
C24 C25 1.531(9) . ? 
C25 C26 1.540(9) . ? 
C26 C27 1.532(8) . ? 
C27 C28 1.515(9) . ? 
C28 C29 1.510(9) . ? 
C29 C30 1.532(9) . ? 
C30 C31 1.506(9) . ? 
C31 C32 1.516(9) . ? 
C32 C33 1.531(9) . ? 
C33 C34 1.517(9) . ? 
C34 C35 1.511(9) . ? 
C35 C36 1.526(9) . ? 
C36 C37 1.510(9) . ? 
C37 C38 1.514(10) . ? 
 
loop_ 
 _geom_angle_atom_site_label_1 
 _geom_angle_atom_site_label_2 
 _geom_angle_atom_site_label_3 
 _geom_angle 
 _geom_angle_site_symmetry_1 
 _geom_angle_site_symmetry_3 
 _geom_angle_publ_flag 
O1 Mo1 O2 104.3(2) . . ? 
O1 Mo1 O4 101.0(2) . . ? 
O2 Mo1 O4 100.2(2) . . ? 
O1 Mo1 O3 99.4(2) . . ? 
O2 Mo1 O3 97.1(2) . . ? 
O4 Mo1 O3 148.98(19) . . ? 
O1 Mo1 O13 91.38(19) . . ? 
O2 Mo1 O13 163.62(19) . . ? 
O4 Mo1 O13 81.03(19) . . ? 
O3 Mo1 O13 75.34(19) . . ? 
O1 Mo1 O11 165.5(2) . 2_666 ? 
O2 Mo1 O11 89.9(2) . 2_666 ? 
O4 Mo1 O11 73.43(17) . 2_666 ? 
O3 Mo1 O11 81.07(18) . 2_666 ? 
O13 Mo1 O11 74.70(17) . 2_666 ? 
O6 Mo2 O5 104.6(2) . . ? 
O6 Mo2 O4 100.2(2) . . ? 
O5 Mo2 O4 100.5(2) . . ? 
O6 Mo2 O7 102.3(2) . . ? 
O5 Mo2 O7 98.0(2) . . ? 
O4 Mo2 O7 146.13(19) . . ? 
O6 Mo2 O10 89.44(19) . . ? 
O5 Mo2 O10 165.72(19) . . ? 
O4 Mo2 O10 79.36(17) . . ? 
O7 Mo2 O10 75.91(17) . . ? 
O6 Mo2 O11 162.45(19) . 2_666 ? 
O5 Mo2 O11 92.5(2) . 2_666 ? 
O4 Mo2 O11 72.27(17) . 2_666 ? 
O7 Mo2 O11 78.79(18) . 2_666 ? 
O10 Mo2 O11 73.74(17) . 2_666 ? 
O12 Mo3 O13 107.4(2) . . ? 
O12 Mo3 O10 108.3(2) . . ? 
O13 Mo3 O10 111.7(2) . . ? 
O12 Mo3 O11 108.5(2) . . ? 
O13 Mo3 O11 110.2(2) . . ? 
O10 Mo3 O11 110.6(2) . . ? 
O9 Mo4 O8 107.5(2) . . ? 
O9 Mo4 O3 102.4(2) . 2_666 ? 
O8 Mo4 O3 106.6(2) . 2_666 ? 
O9 Mo4 O7 106.5(2) . . ? 
O8 Mo4 O7 104.6(2) . . ? 
O3 Mo4 O7 127.9(2) 2_666 . ? 
Mo4 O3 Mo1 129.3(2) 2_666 . ? 
Mo2 O4 Mo1 120.3(2) . . ? 
Mo4 O7 Mo2 131.5(2) . . ? 
Mo3 O10 Mo2 126.7(2) . . ? 
Mo3 O11 Mo1 135.5(2) . 2_666 ? 
Mo3 O11 Mo2 135.4(2) . 2_666 ? 
Mo1 O11 Mo2 88.87(16) 2_666 2_666 ? 
Mo3 O13 Mo1 127.7(2) . . ? 
C1 N1 C3 108.0(5) . . ? 
C1 N1 C2 109.1(5) . . ? 
C3 N1 C2 107.9(5) . . ? 
C1 N1 C4 111.4(5) . . ? 
C3 N1 C4 111.4(6) . . ? 
C2 N1 C4 109.0(5) . . ? 
C21 N2 C22 107.5(6) . . ? 
C21 N2 C23 110.5(6) . . ? 
C22 N2 C23 110.8(5) . . ? 
C21 N2 C20 108.6(5) . . ? 
C22 N2 C20 108.0(5) . . ? 
C23 N2 C20 111.4(5) . . ? 
C5 C4 N1 116.6(5) . . ? 
C4 C5 C6 110.9(6) . . ? 
C5 C6 C7 112.5(6) . . ? 
C6 C7 C8 114.3(6) . . ? 
C7 C8 C9 114.2(6) . . ? 
C10 C9 C8 115.4(6) . . ? 
C9 C10 C11 113.4(6) . . ? 
C10 C11 C12 113.5(5) . . ? 
C13 C12 C11 114.0(6) . . ? 
C12 C13 C14 113.1(6) . . ? 
C13 C14 C15 114.3(6) . . ? 
C14 C15 C16 114.0(5) . . ? 
C15 C16 C17 115.2(6) . . ? 
C18 C17 C16 113.5(6) . . ? 
C19 C18 C17 112.0(6) . . ? 
N2 C23 C24 114.6(5) . . ? 
C23 C24 C25 111.0(6) . . ? 
C24 C25 C26 113.8(6) . . ? 
C27 C26 C25 115.1(6) . . ? 
C28 C27 C26 110.9(6) . . ? 
C27 C28 C29 115.1(6) . . ? 
C28 C29 C30 113.7(6) . . ? 
C31 C30 C29 115.6(6) . . ? 
C30 C31 C32 114.7(6) . . ? 
C31 C32 C33 114.2(6) . . ? 
C34 C33 C32 112.3(6) . . ? 
C35 C34 C33 113.2(5) . . ? 
C34 C35 C36 114.7(6) . . ? 
C37 C36 C35 115.1(6) . . ? 
C36 C37 C38 113.4(6) . . ? 
 
_diffrn_measured_fraction_theta_max    0.927 
_diffrn_reflns_theta_full              27.48 
_diffrn_measured_fraction_theta_full   0.927 
_refine_diff_density_max    1.076 
_refine_diff_density_min   -1.108 
_refine_diff_density_rms    0.166 
